# Supplementary material for: Schlag auf Schlag – Bericht über feuerwerksbedingte Knalltraumata zum Jahreswechsel 2021/2022
Source: Springer Nature journal article supplement (doi:10.1007/s00106-022-01259-6), 2023-01-01
Supplement: MOESM1 [file 23892558]

# Erhebungsbogen Knalltraumaregister 2021

|                      |                            |                                                                                       |
|----------------------|----------------------------|---------------------------------------------------------------------------------------|
| Unfalltag<br>(Datum) |                            | Selbst gezündet <input type="checkbox"/><br>oder Zuschauer <input type="checkbox"/> ? |
| Alter                | Jahre                      |                                                                                       |
| Geschlecht           | M:                      W: |                                                                                       |

## Art der Verletzung

|                            |      |                                                                                           |              |                  |       |          |
|----------------------------|------|-------------------------------------------------------------------------------------------|--------------|------------------|-------|----------|
| <b>Hörschaden</b>          | Nein | Ja                                                                                        |              |                  |       |          |
|                            |      | Sensorineural                                                                             | Schalleitung | kombiniert       |       |          |
|                            |      | WHO-Grad                                                                                  | 0            | 25dB oder besser |       |          |
|                            |      | Mittlerer Hörverlust aus dem Mittelwert im Reintonaudiogramm bei 500, 1000, 2000, 4000 Hz | 1            | 26-40db          |       |          |
|                            |      |                                                                                           | 2            | 41-60db          |       |          |
|                            |      |                                                                                           | 3            | 61-80db          |       |          |
|                            |      |                                                                                           | 4            | 81db oder mehr   |       |          |
| Behandlung                 |      |                                                                                           |              |                  |       |          |
| <b>Tinnitus</b>            | Nein | Ja                                                                                        |              |                  |       |          |
| <b>Schwindel</b>           | Nein | Ja                                                                                        |              |                  |       |          |
|                            |      | Spontan-nystagmus?                                                                        | Nein         | Ja               |       |          |
|                            |      |                                                                                           |              | rechts           | links | vertikal |
| <b>Begleitverletzungen</b> | Nein | Ja                                                                                        |              |                  |       |          |

|  |                        |      |    |
|--|------------------------|------|----|
|  | Trommelfellverletzung: | Nein | Ja |
|--|------------------------|------|----|

## Art der Behandlung

|                                                         |                                                                                    |
|---------------------------------------------------------|------------------------------------------------------------------------------------|
| <b>Ambulant</b>                                         | <b>Stationär</b>                                                                   |
| Medikamentös (z.B. Cortison, Pentoxifyllin, Tebonin...) | Operativ (Infusion, Trommelfellschienung, Myringoplastik, Rundfensterabdeckung...) |

## Bemerkungen/Ergänzungen

Klinikstempel

Name Behandler

**Bitte senden an:**

**FAX:** +4968411622997

**Email:** [knalltrauma@uks.eu](mailto:knalltrauma@uks.eu)

**Post:**

Prof. Dr. med. A. Bozzato

Klinik für Hals-, Nasen- und Ohrenheilkunde

UKS – Universitätsklinikum des Saarlandes

Gebäude 6

D-66421 Homburg
